# Supplementary material for: The Urokinase Receptor Induces a Mesenchymal Gene Expression Signature in Glioblastoma Cells and Promotes Tumor Cell Survival in Neurospheres
Source: PubMed Central journal article supplement (PMC5813209; doi:10.1038/s41598-018-21358-1), 2018-02-14
Supplement: 41598_2018_21358_MOESM1_ESM.pdf [file 41598_2018_21358_MOESM1_ESM.pdf]

The Urokinase Receptor Induces a Mesenchymal Gene  
Expression Signature in Glioblastoma Cells and Promotes Tumor  
Cell Survival in Neurospheres

Andrew S. Gilder, Letizia Natali, Danielle M. Van Dyk, Cristina  
Zalfa, Michael A. Banki, Donald P. Pizzo, Huawei Wang, Richard  
L. Klemke, Elisabetta Mantuano, and Steven L. Goniats

Supplemental Figures 1 and 2

# Supplemental Fig. 1

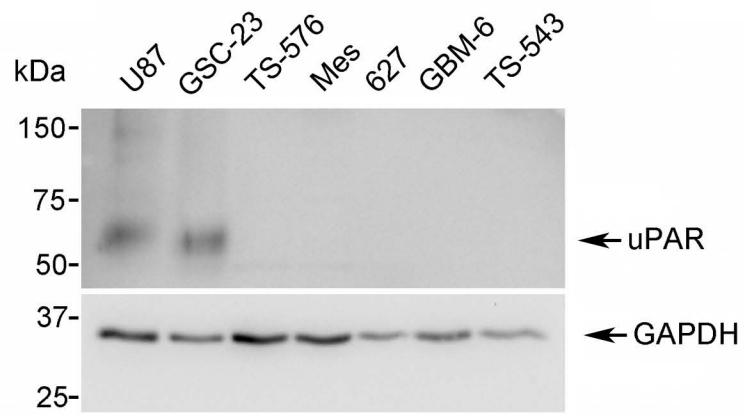

Supplemental Figure 1. Original immunoblot shown in Fig. 5C.

## Supplemental Fig. 2

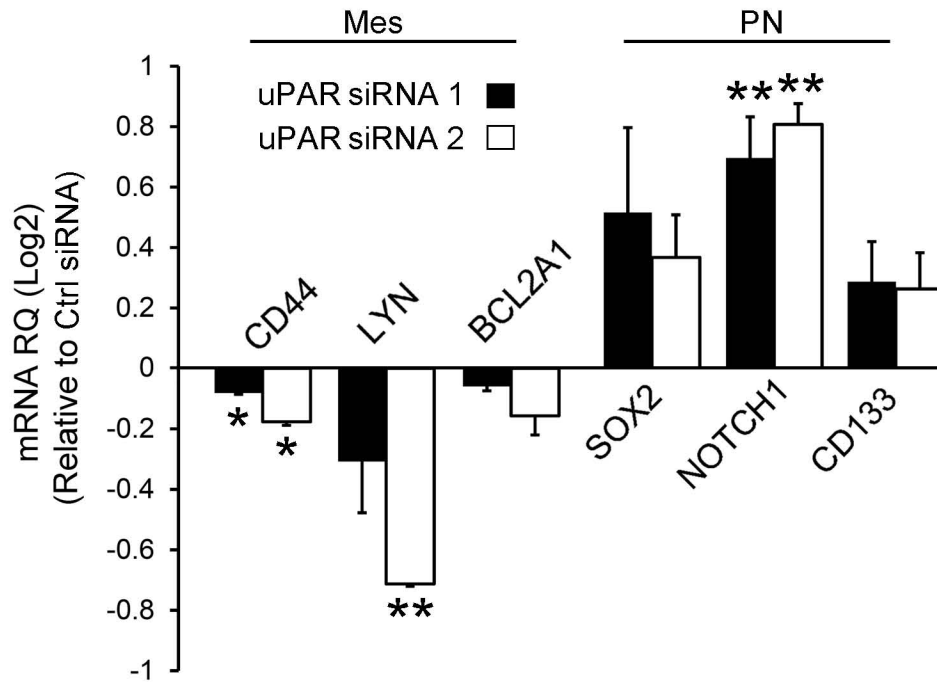

Supplemental Figure 2. RT-qPCR was performed to determine relative mRNA expression for *CD44*, *LYN*, *BCL2A1*, *SOX2*, *NOTCH1*, and *CD133* in U87vIII neurospheres transiently expressing *PLAUR*-targeting siRNA (siRNA1, siRNA2) versus NTC siRNA (Ctrl siRNA) (mean  $\pm$  S.E., n=3; student's t-test \*\*p<0.01; p<0.05).
